# Supplementary material for: Psychometric properties of the Brisbane Burn Scar Impact Profile in adults with burn scars
Source: PubMed Central journal article supplement (PMC5597202; doi:10.1371/journal.pone.0184452), 2017-09-13
Supplement: pone.0184452.s002.pdf [file pone.0184452.s002.pdf]

S2 File. Reproducibility of the Patient Observer Scar Assessment Scale Items and SF-36 dimensions

| Scale                     | No of paired obs. (no. of response option points) | Intraclass correlation coefficient (95%CI) | Residual | SEM  | SDC  | No. (%) of paired observations with exact agreement | No. (%) of paired observations with exact agreement and 1 point difference | No. (%) of paired observations with exact agreement, 1 or 2 point difference |
|---------------------------|---------------------------------------------------|--------------------------------------------|----------|------|------|-----------------------------------------------------|----------------------------------------------------------------------------|------------------------------------------------------------------------------|
| POSAS – patient scale     |                                                   |                                            |          |      |      |                                                     |                                                                            |                                                                              |
| Item 1 Painful            | 59 (10)                                           | 0.72 (0.51 -0.84)                          | 1.66     | 1.29 | 3.58 | 18 (31%)                                            | 39 (66% )                                                                  | 49 (83%)                                                                     |
| Item 2 Itching            | 59 (10)                                           | 0.53 (0.29 – 0.70)                         | 3.03     | 1.74 | 4.82 | 9 (15%)                                             | 27 (46%)                                                                   | 43 (73%)                                                                     |
| Item 3 Colour             | 59 (10)                                           | 0.67 (0.47 – 0.80)                         | 1.62     | 1.27 | 3.53 | 19 (32%)                                            | 35 (59%)                                                                   | 49 (83%)                                                                     |
| Item 4 Stiffness          | 59 (10)                                           | 0.65 (0.48 – 0.78)                         | 2.72     | 1.65 | 4.57 | 16 (2%)                                             | 33 (43%)                                                                   | 45 (76%)                                                                     |
| Item 5 Thickness          | 59 (10)                                           | 0.57 (0.36 – 0.72)                         | 3.34     | 1.83 | 5.07 | 13 (22%)                                            | 36 (61%)                                                                   | 53 (90%)                                                                     |
| Item 6 Irregular          | 58 (10)                                           | 0.72 (0.57 – 0.83)                         | 2.10     | 1.45 | 4.02 | 17 (29%)                                            | 33 (57%)                                                                   | 48 (83%)                                                                     |
| Item 7 overall appearance | 60 (10)                                           | 0.65 (0.48 – 0.78)                         | 2.26     | 1.50 | 4.16 | 19 (32%)                                            | 32 (53%)                                                                   | 49 (82%)                                                                     |
| POSAS – observer scale    |                                                   |                                            |          |      |      |                                                     |                                                                            |                                                                              |
| Item 1 Vascularity        | 49 (10)                                           | 0.63 (0.42 – 0.77)                         | 1.59     | 1.26 | 4.41 | 15 (31%)                                            | 31 (63%)                                                                   | 40 (82%)                                                                     |
| Item 2 Pigmentation       | 49 (10)                                           | 0.85 (0.75 – 0.92)                         | 0.99     | 0.99 | 2.74 | 22 (45%)                                            | 39 (80%)                                                                   | 45 (92%)                                                                     |

|                               |         |                    |      |      |      |          |          |          |
|-------------------------------|---------|--------------------|------|------|------|----------|----------|----------|
| Item 3 Thickness <sup>a</sup> | 48 (10) | 0.78 (0.64 – 0.87) | 0.93 | 0.96 | 2.67 | 17 (35%) | 39 81%   | 45 (94%) |
| Item 4 Relief                 | 49 (10) | 0.60 (0.39 – 0.76) | 2.13 | 1.46 | 5.90 | 11 (22%) | 35 (71%) | 40(82%)  |
| Item 5 Pliability             | 48 (10) | 0.85 (0.74 – 0.92) | 1.00 | 1.0  | 2.77 | 17(35%)  | 37(77%)  | 44 (92%) |
| Item 7 Overall                | 48 (10) | 0.78 (0.63 – 0.87) | 0.87 | 0.93 | 2.58 | 13 (27%) | 35(73%)  | 45 (94%) |

opinion <sup>a</sup>

---

SF-36<sup>b</sup>

|                            |          |                    |        |       |       |          |          |          |
|----------------------------|----------|--------------------|--------|-------|-------|----------|----------|----------|
| Physical Function          | 61 (3)   | 0.40 (0.16 – 0.59) | 280.21 | 16.74 | 46.40 | 11 (18%) | 21 (34%) | 28 (46%) |
| Role Physical <sup>c</sup> | 58 (5)   | 0.68 (0.51 – 0.80) | 292.12 | 17.09 | 47.37 | 8 (14%)  | 19 (33%) | 19 (33%) |
| Bodily Pain                | 59 (5,6) | 0.53 (0.29 – 0.70) | 324.60 | 18.02 | 49.95 | 13 (22%) | 13 (22%) | 24 (41%) |
| General Health             | 59 (5)   | 0.78 (0.65 – 0.86) | 74.06  | 8.61  | 23.87 | 16 (27%) | 30(51%)  | 42 (71%) |
| Vitality                   | 60 (5)   | 0.59 (0.40 – 0.73) | 192.91 | 13.89 | 38.50 | 12 (20%) | 26 (43%) | 26 (43%) |
| Social Function            | 60 (5)   | 0.71 (0.55 -0.82)  | 210.54 | 14.51 | 40.22 | 18 (30%) | 18 (30%) | 18 (30%) |
| Role Emotional             | 59 (5)   | 0.69 (0.51 – 0.80) | 328.03 | 18.11 | 50.20 | 23 (39%) | 23 (39%) | 32 (54%) |
| Mental Health              | 59 (5)   | 0.63 (0.44 – 0.76) | 127.84 | 11.31 | 31.35 | 8 (14%)  | 28 (47%) | 34 (58%) |

---

<sup>a</sup> 1 outlier case removed

<sup>b</sup> values based on standard scores on a 0 to 100 scale

<sup>c</sup> 2 outlier cases removed

Abbreviations: SEM = standard error of measurement; SDC = smallest detectable change
